# Supplementary material
Source: publisher site journal article supplement (https://www.spandidos-publications.com/6774/downloadSupplementary)
Supplement: Supplementary file 1 [file downloadSupplementary]

## Sheet: Supplementary_Table_SX
Table SX. List of genes in six clusters identified by time series analysis.
Gene	Cluster
KIAA1755	C1
SNORD60	C1
LOC105377642	C1
LOC124903365	C1
VTCN1	C1
STRC	C1
LINC02995	C1
LOC105372501	C1
CCL20	C1
LOC124909371	C1
AMM49_RS04900	C1
SNHG22	C1
PPFIA4	C1
SOWAHD	C1
LINC01285	C1
BNC1	C1
RP1	C1
PPP1R14C	C1
LOC107984862	C1
LOC105369299	C1
DUSP5-DT	C1
BEX4	C1
KRT16	C1
MATN4	C1
FAM66C	C1
CCDC196	C1
SNHG28	C1
CYRIA	C1
SPRY4-AS1	C1
LOC107985238	C1
CPEB1	C1
LOC124904264	C1
SLC22A31	C1
FAM86FP	C1
MUC5B	C1
AATK	C1
ARHGDIG	C1
SGSM1	C1
CGB7	C1
LINC00273	C1
CROCC	C1
RNA45SN3_1	C1
EDN2	C1
PDGFB	C1
DLX3	C1
CAPSL	C1
ERRFI1-DT	C1
CCN2	C1
EGR1	C1
FOSB	C1
EGR3	C1
CMAHP	C2
ATF3	C2
LOC124909423	C2
NGF	C2
WIPF3	C2
MAGI2-AS3	C2
LOC105377275	C2
LOC112268061	C2
LINC02806	C2
CXCL2	C2
IL1A	C2
ULBP1	C2
TSLP	C2
CXCL8	C2
TCP11L2	C2
PPM1E	C2
LOC101930053	C2
DDR2	C2
TUBB2B	C2
CXCL1	C2
SLAMF9	C2
TDRKH-AS1	C2
CYP1A1	C2
IL1B	C2
CTH	C2
LRATD2	C2
LOC124901137	C2
CHAC1	C2
G0S2	C2
NUPR1	C2
ADM2	C2
SH3BP2	C2
DDIT3	C2
FUT1	C2
ASNS	C2
FGF21	C2
CXCL3	C2
HRK	C2
STC2	C2
VLDLR-AS1	C2
LINC01686	C2
TMEFF1	C3
NTF4	C3
GPR150	C3
RELB	C3
KLHL30	C3
GAA	C3
NKX2-8	C3
CACNG6	C3
CPAMD8	C3
ISLR2	C3
PCK2	C3
C7orf57	C3
KISS1R	C3
DUSP15	C3
OPRL1	C3
DMKN	C4
PTH1R	C4
LOC107984000	C4
LINC02009	C4
SBK2	C4
MB	C4
ACP5	C4
SHC2	C4
BHMT	C4
CD38	C4
LOC124904218	C4
ADRA1D	C4
LINC00592	C4
ARMC3	C4
LINC02522	C4
FAM167A	C4
IGDCC4	C4
SDR16C5	C4
ELN-AS1	C4
INHBC	C4
RAB11FIP4	C4
SRCIN1	C4
SLAMF8	C4
LOC124907991	C4
CRYBG2	C4
LOC124903750	C4
CHAD	C4
WFDC2	C4
LOC105377720	C4
NCAN	C4
FIBCD1-AS1	C4
LOC124903862	C4
LINC01607	C4
SLC16A1	C4
LOC105379311	C4
HKDC1	C4
GABRG1	C4
LOC107984334	C4
LOC101928994	C4
CSTA	C4
NOD2	C4
LOC105370455	C4
EFCC1	C4
ADAMTS14	C4
LOC107984819	C4
FAM167A_1	C4
LOC105377374	C4
TMEM92-AS1	C4
LOC124902947	C4
LOC112268079	C4
CHRNB4	C4
STAP2	C4
NRTN	C4
LINC02323	C4
KNDC1	C4
NPAS1	C4
MEGF6	C4
NOXA1	C4
LOC124902312	C4
RGS11	C4
SEPT5-GP1BB	C4
GSTM2	C4
FNDC4	C4
MIR616	C4
ACSS1	C4
VPS37D	C4
ADGRG3	C4
LOC105379312	C4
ATP1A2	C4
RBPJL	C4
GUSBP19	C4
CDH15	C4
OSCAR	C4
TMC8	C4
LOC124904771	C4
PRPH	C4
MYCL	C4
SHISA2	C4
LINC01703	C4
COL6A2	C4
RYR1	C4
LOC124900693	C4
LOC101928419	C4
RENBP	C4
FXYD4	C4
LOC124900954	C4
CD22	C4
STK32A	C4
HCK	C4
LINC01512	C4
NPHS1	C4
UBE2L6	C4
LCN2	C4
NMNAT3	C4
TNFRSF1B	C4
ZNF204P	C4
LOC107986606	C4
RIMS3	C4
DMGDH	C4
SCN4A	C4
SLC26A9-AS1	C4
UNC5B	C4
BEX2	C4
LOC124903744	C4
TMEM45B	C4
LOC124901152	C4
LOC124901011	C4
S100P	C4
NIBAN1	C4
FIBIN	C4
TNFRSF9	C4
SMC1B	C4
LOC124905103	C4
STEAP1	C4
LOC105373349	C4
STEAP2	C4
LOC101928516	C4
LINGO1	C4
LINC01260	C4
TMEM255B	C4
SLC45A1	C4
PLAC1	C4
RASGRP2	C4
MIR3189	C4
LTF	C4
RRAGD	C4
ABLIM3	C4
HSD11B1-AS1	C4
LOC124904731	C4
LOC101929174	C4
INHBE	C4
HERPUD1	C4
KCNJ11	C4
TRIB3	C4
SLC43A1	C4
KLF15	C4
KIF21B	C4
GDF15	C4
RPLP0P2	C4
JAK3	C4
WNT11	C4
ARHGEF2-AS2	C4
CEBPA-DT	C4
PRSS33	C4
PDE9A	C4
SKAP1	C4
HID1	C4
HSPA5	C4
MOV10L1	C4
PTPRH	C4
DENND1C	C4
MYCBPAP	C4
PNMA6A	C4
SH2D2A	C4
LOC102725231	C4
ERFE	C4
IGFBP1	C4
PTX3	C4
KLHDC7B	C4
PCDH1	C4
ERICH2	C4
LOC112268102	C4
AKNA	C4
MLXIPL	C4
LUNAR1	C4
LINC02874	C4
ESPN	C4
TMEM169	C4
CCNP	C4
KCNQ4	C4
CERS4	C4
LOC105378568	C4
LOC107986819	C4
HSD17B14	C4
PTGDS	C4
TMIE	C4
LOC124902253	C4
NECAB2	C4
PRODH	C4
LOC105374781	C4
F2RL3	C4
DERL3	C4
MIR3142HG	C4
LOC105377599	C5
C12orf40	C5
LOC105371880	C5
MAGI1-AS1	C5
LOC101928214	C5
LOC107987100	C5
LOC105376933	C5
LOC124902011	C5
PCA3	C5
LOC107984315	C5
LOC105372669	C5
LOC107987182	C5
LOC124905263	C5
LOC124903894	C5
HTR2B	C5
LOC124903942	C5
LOC105373707	C5
LOC124903192	C5
RNU6-8	C6
LOC124906020	C6
TRS-CGA1-1	C6
SNAP25-AS1	C6
HSPA8	C6
HSPA1B_1	C6
HSPA1B_4	C6
HSPA1B_2	C6
LOC105375262	C6
PLA2G3	C6
TRA-TGC4-1	C6
TRK-TTT3-1	C6
FAM83E	C6
LOC124902241	C6
LOC124900465	C6
TXNIP	C6
P2RY6	C6
LOC124905415	C6
RNVU1-8	C6
LOC124904621	C6
RNVU1-6	C6
PRKCB	C6
TRH-GTG1-5	C6
LOC124904627	C6
TRC-GCA8-1	C6
TRP-TGG1-1	C6
RNU4ATAC	C6
TRR-TCG2-1	C6
LOC105376076	C6
SNORD3B-1	C6
TRN-GTT1-1	C6
SNORD20	C6
LOC105377328	C6
LOC124900244	C6
LOC102723490	C6
RNU5B-1	C6
SNORD3B-2	C6
OVCH1	C6
LOC124906307	C6
UNC5D	C6
SLCO1C1	C6
SNORD13	C6
LOC124901422	C6
RNU5F-1	C6
IFNA1	C6
LOC102724851_1	C6
LOC105377404	C6
HIF1A-AS1	C6
LOC124901356	C6
FAM106B	C6
